# Supplementary material for: Thin-Slice Measurement of Wisdom
Source: PubMed Central journal article supplement (PMC5559494; doi:10.3389/fpsyg.2017.01378), 2017-08-15
Supplement: Image_1.pdf [file Image_1.pdf]

## *Supplementary Material*

# **Adaptation of Western Wisdom Paradigms and development of a 2nd person measurement for Chinese**

Chao S. Hu \*, Michel Ferrari, Qiandong Wang, Earl Woodruff

\* **Correspondence:** Chao S. Hu: [chao.super.hu@gmail.com](mailto:chao.super.hu@gmail.com)

### **1 Supplementary Figures**

#### **1.1 Scatterplot for the correlation of proportional time of surprise with Chinese wisdom rating.**

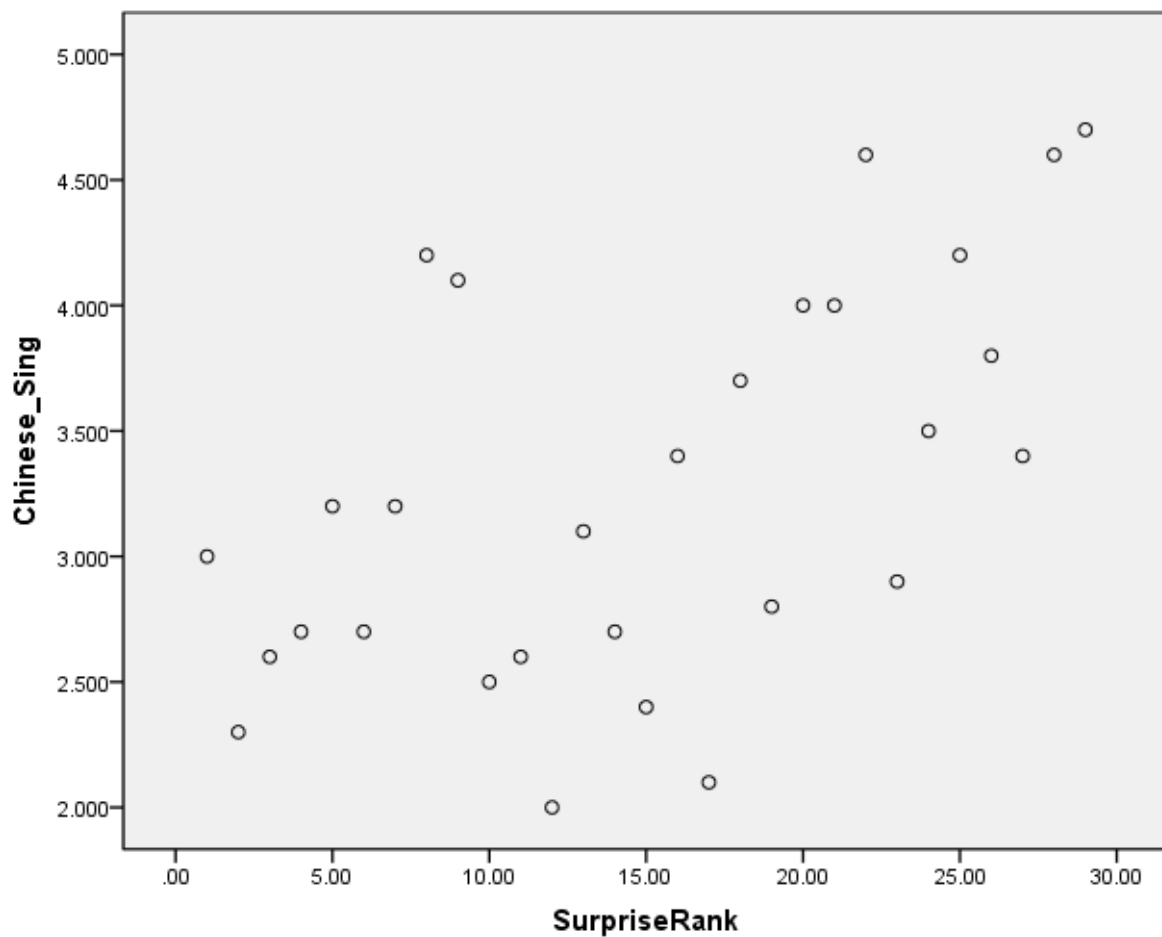

(Note: the rank of the proportional time is used as the X-axis , just as the Spearman correlation analysis was applied, because the distribution of the proportional time data was not normal.)

## 1.2 Scatterplot for the correlation of proportional time of surprise with Berlin wisdom rating.

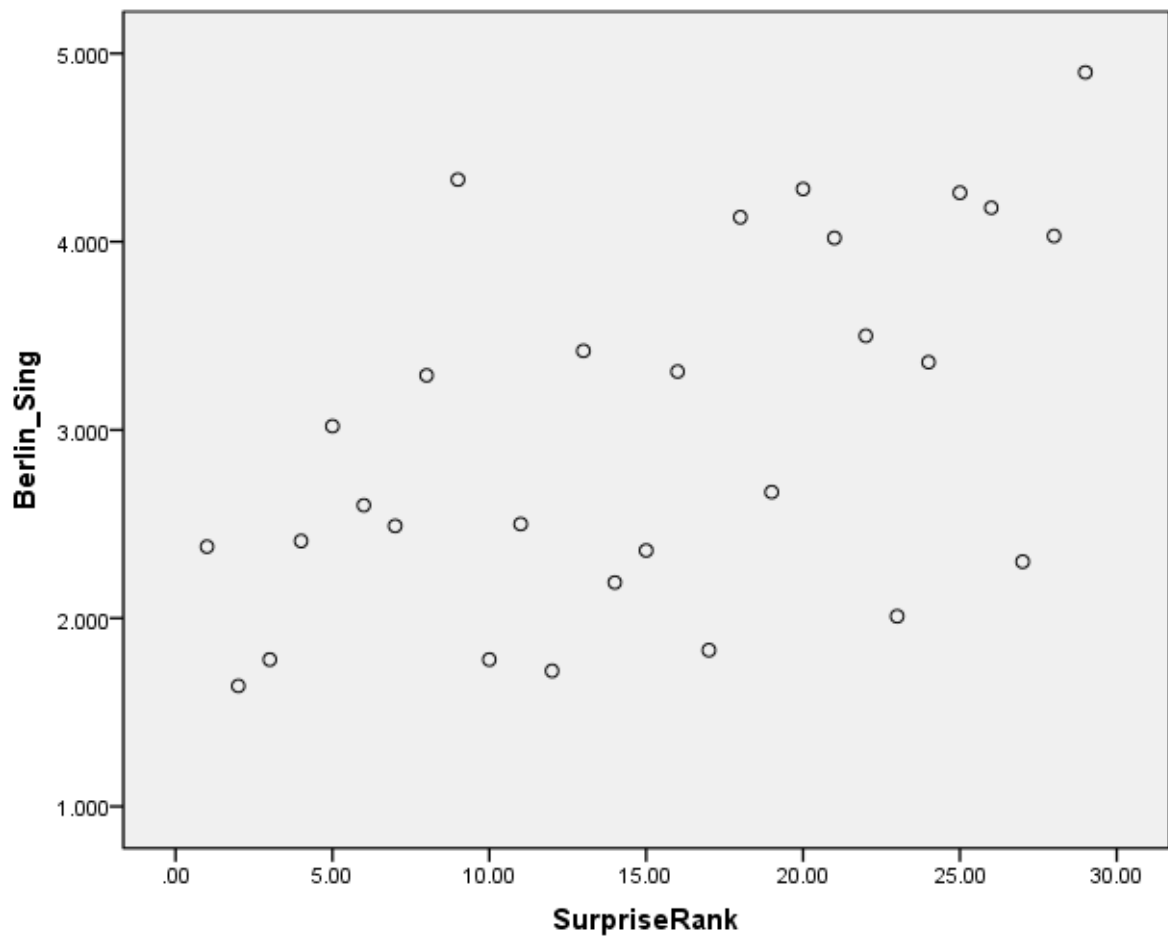

(Note: the rank of the proportional time is used as the X-axis , just as the Spearman correlation analysis was applied, because the distribution of the proportional time data was not normal.)
